# Supplementary material for: Conclusive evidence for hexasomic inheritance in chrysanthemum based on analysis of a 183 k SNP array
Source: PubMed Central journal article supplement (PMC5547472; doi:10.1186/s12864-017-4003-0), 2017-08-07
Supplement: 12864_2017_4003_MOESM1_ESM.pdf [file 12864_2017_4003_MOESM1_ESM.pdf]

---

| <b>genotype</b> | <b>flower type</b> | <b>flower colour</b> |
|-----------------|--------------------|----------------------|
| DB36451         | single             | white                |
| DB39287         | single             | white                |
| DB9541          | single             | red                  |
| DB9656          | small-<br>flowered | white                |
| DB10957         | single             | red                  |
| DB13124         | single             | purple               |
| DB13601         | double             | white                |
| DB21697         | double             | white                |
| DB28990         | semi-double        | purple               |
| DB30600         | double             | white                |
| DB34154         | single             | white                |
| DB41234         | double             | green                |

---
