# Supplementary material for: Conclusive evidence for hexasomic inheritance in chrysanthemum based on analysis of a 183 k SNP array
Source: PubMed Central journal article supplement (PMC5547472; doi:10.1186/s12864-017-4003-0), 2017-08-07
Supplement: 12864_2017_4003_MOESM2_ESM.pdf [file 12864_2017_4003_MOESM2_ESM.pdf]

| <b>sample</b>  | <b>Number of reads</b> | <b>uclust</b> | <b>Number of contigs</b> | <b>average contig length (bp)</b> | <b>n50 (bp)</b> | <b>n10 (bp)</b> | <b>longest 1000 contig length (bp)</b> |
|----------------|------------------------|---------------|--------------------------|-----------------------------------|-----------------|-----------------|----------------------------------------|
| <b>DB36451</b> | 105660926              | n             | 270186                   | 628.10                            | 841             | 2354            | 4513.33                                |
|                |                        | y             | 227213                   | 654.06                            | 867             | 2236            | 4130.06                                |
| <b>DB39287</b> | 103582212              | n             | 275397                   | 618.84                            | 811             | 2317            | 4556.42                                |
|                |                        | y             | 231634                   | 644.52                            | 839             | 2191            | 4137.46                                |
