# Supplementary material for: Conclusive evidence for hexasomic inheritance in chrysanthemum based on analysis of a 183 k SNP array
Source: PubMed Central journal article supplement (PMC5547472; doi:10.1186/s12864-017-4003-0), 2017-08-07

One missing (55%)

Not corresponding (1.1%)

Corresponding (44%)

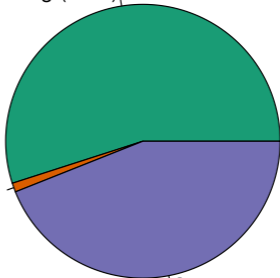

Supplement: 12864_2017_4003_MOESM6_ESM.pdf [file 12864_2017_4003_MOESM6_ESM.pdf]
