# Supplementary material for: Conclusive evidence for hexasomic inheritance in chrysanthemum based on analysis of a 183 k SNP array
Source: PubMed Central journal article supplement (PMC5547472; doi:10.1186/s12864-017-4003-0), 2017-08-07
Supplement: 12864_2017_4003_MOESM7_ESM.pdf [file 12864_2017_4003_MOESM7_ESM.pdf]

| <b>sample</b> | <b>type of tissue</b> | <b>days at 14h photoperiod</b> | <b>days at 11 hour photoperiod</b> |
|---------------|-----------------------|--------------------------------|------------------------------------|
| 1             | Vegetative shoots     | 10                             | 0                                  |
| 2             | Vegetative shoots     | 12                             | 3                                  |
| 3             | Green flower buds     | 13                             | 29                                 |
| 4             | Green flower buds     | 12                             | 36                                 |
| 5             | Colouring flower buds | 13                             | 52                                 |
